# Supplementary material
Source: Springer Nature journal article supplement (https://www.springermedizin.de/resource/supplementary/12978_2013_245_MOESM4_ESM.pdf/9602310)
Supplement: MOESM4 [file 9602310]

| Types of psychological violence                                | Frequency | Percent |
|----------------------------------------------------------------|-----------|---------|
| Jealous or angry if she talk to other men                      | 406       | 59.5%   |
| Insisted knowing where the women at all time                   | 388       | 56.9%   |
| Insulted by their husband using abusive language               | 348       | 51.0%   |
| Threatened by an object like stick, belt, gun or other weapon  | 160       | 23.5%   |
| Create financial hardship or not trust her                     | 139       | 20.4%   |
| Frightened their husband by looking angrily at her             | 226       | 33.1%   |
| Expressed suspicion or accuses him that he is unfaithful       | 140       | 20.5%   |
| Ignored or shown in difference                                 | 127       | 18.6%   |
| Deprived privilege in the family                               | 89        | 13.0%   |
| Denied by their husband on their basic personal needs          | 94        | 13.8%   |
| Intentionally makes not involved on decision making            | 95        | 13.9%   |
| Belittled or humiliated them in front of others                | 87        | 12.8%   |
| Done things to scare or intimidate them purposely              | 185       | 27.1%   |
| Restricted from going to their parent's, relative or workshops | 191       | 28.0%   |
| ** multiple response were possible                             |           |         |
